# Supplementary material
Source: PubMed Central journal article supplement (PMC6364138)
Supplement: Supplemental_Tables.pdf [file Supplemental_Tables.pdf]

**Table S1.** Characteristics of the 2007-2008 Canadian Community Health Survey sample.

|                                      | Frequency (95% CI) or Mean (SD)     |                                 | <i>p</i> -value <sup>a</sup> |
|--------------------------------------|-------------------------------------|---------------------------------|------------------------------|
|                                      | <u>Total Sample</u><br>(n = 34,010) | <u>Depressed</u><br>(n = 2,207) |                              |
| Age (Years)                          |                                     |                                 | <.0001                       |
| 18-19                                | 2.46 (2.29, 2.62)                   | 3.49 (2.71, 4.28)               |                              |
| 20-24                                | 8.23 (7.94, 8.52)                   | 8.47 (7.27, 9.66)               |                              |
| 25-29                                | 9.26 (8.96, 9.57)                   | 14.08 (12.59, 15.57)            |                              |
| 30-34                                | 9.31 (9.00, 9.62)                   | 10.92 (9.58, 12.26)             |                              |
| 35-39                                | 9.11 (8.80, 9.41)                   | 8.61 (7.40, 9.81)               |                              |
| 40-44                                | 10.16 (9.84, 10.49)                 | 11.83 (10.44, 13.21)            |                              |
| 45-49                                | 10.94 (10.61, 11.28)                | 12.63 (11.21, 14.06)            |                              |
| 50-54                                | 10.51 (10.18, 10.83)                | 11.66 (10.28, 13.04)            |                              |
| 55-59                                | 8.75 (8.45, 9.06)                   | 8.19 (7.02, 9.37)               |                              |
| 60-64                                | 6.79 (6.52, 7.06)                   | 5.07 (4.13, 6.02)               |                              |
| 65-69                                | 5.10 (4.87, 5.34)                   | 2.13 (1.51, 2.75)               |                              |
| 70-74                                | 3.98 (3.77, 4.19)                   | 1.36 (0.87, 1.86)               |                              |
| 75-79                                | 2.90 (2.72, 3.08)                   | 0.82 (0.43, 1.21)               |                              |
| 80+                                  | 2.49 (2.32, 2.65)                   | 0.73 (0.37, 1.10)               |                              |
| Sex                                  |                                     |                                 | <.0001                       |
| Male                                 | 51.25 (50.72, 51.78)                | 35.98 (33.92, 38.05)            |                              |
| Female                               | 48.75 (48.22, 49.28)                | 64.02 (61.95, 66.08)            |                              |
| Ethnicity                            |                                     |                                 | .68                          |
| White                                | 89.08 (88.75, 89.41)                | 89.35 (88.03, 90.68)            |                              |
| Visible Minority                     | 10.92 (10.59, 11.25)                | 10.65 (9.32, 11.97)             |                              |
| Marital Status                       |                                     |                                 | <.0001                       |
| Married/Common-Law                   | 64.73 (64.23, 65.24)                | 47.40 (45.26, 49.55)            |                              |
| Widowed/Separated/Divorced           | 13.11 (12.75, 13.47)                | 19.05 (17.36, 20.73)            |                              |
| Single                               | 22.15 (21.71, 22.60)                | 33.55 (31.52, 35.57)            |                              |
| Income (\$)                          |                                     |                                 | <.0001                       |
| <20,000                              | 9.50 (9.19, 9.81)                   | 16.16 (14.58, 17.73)            |                              |
| 20,000-39,999                        | 20.06 (19.63, 20.49)                | 23.52 (21.70, 25.34)            |                              |
| 40,000-59,999                        | 19.06 (18.64, 19.48)                | 18.87 (17.19, 20.55)            |                              |
| 60,000-79,999                        | 16.13 (15.74, 16.52)                | 15.36 (13.81, 16.91)            |                              |
| ≥ 80,000                             | 35.25 (34.74, 35.75)                | 26.10 (24.21, 27.98)            |                              |
| Education                            |                                     |                                 | <.0001                       |
| < Secondary                          | 16.47 (16.07, 16.86)                | 15.08 (13.55, 16.62)            |                              |
| Secondary                            | 13.84 (13.47, 14.21)                | 14.82 (13.30, 16.35)            |                              |
| Some post-secondary                  | 7.91 (7.63, 8.20)                   | 8.70 (7.49, 9.91)               |                              |
| Post-secondary                       | 61.78 (61.26, 62.30)                | 61.40 (59.31, 63.49)            |                              |
| Presence of Chronic Physical Illness | 33.60 (33.10, 34.11)                | 42.68 (40.55, 44.80)            | <.0001                       |
| Body Mass Index (kg/m <sup>2</sup> ) | 25.96 (4.94)                        | 26.33 (5.86)                    | .005                         |

SD = standard deviation. <sup>a</sup> Statistical significance value from Chi-square test of independence or two sample t-test between depressive status and demographic characteristic.

**Table S2.** Characteristics of the 2009-2010 Canadian Community Health Survey sample.

|                                      | Frequency (95% CI) or Mean (SD) |                      | <i>p</i> -value <sup>a</sup> |
|--------------------------------------|---------------------------------|----------------------|------------------------------|
|                                      | <u>Total Sample</u>             | <u>Depressed</u>     |                              |
|                                      | (n = 11,653)                    | (n = 999)            |                              |
| Age (Years)                          |                                 |                      | <.0001                       |
| 18-19                                | 1.97 (1.72, 2.22)               | 3.37 (2.23, 4.50)    |                              |
| 20-24                                | 7.81 (7.33, 8.30)               | 8.87 (7.08, 10.66)   |                              |
| 25-29                                | 8.96 (8.44, 9.48)               | 12.43 (10.35, 14.50) |                              |
| 30-34                                | 8.25 (7.75, 8.75)               | 7.55 (5.89, 9.21)    |                              |
| 35-39                                | 8.97 (8.45, 9.49)               | 10.17 (8.27, 12.07)  |                              |
| 40-44                                | 10.13 (9.58, 10.68)             | 14.91 (12.67, 17.15) |                              |
| 45-49                                | 11.09 (10.52, 11.66)            | 10.57 (8.64, 12.51)  |                              |
| 50-54                                | 10.59 (10.03, 11.15)            | 11.52 (9.51, 13.52)  |                              |
| 55-59                                | 9.03 (8.51, 9.55)               | 9.89 (8.02, 11.77)   |                              |
| 60-64                                | 7.16 (6.69, 7.62)               | 3.30 (2.18, 4.42)    |                              |
| 65-69                                | 5.74 (5.32, 6.16)               | 3.46 (2.31, 4.61)    |                              |
| 70-74                                | 4.11 (3.75, 4.48)               | 1.89 (1.03, 2.74)    |                              |
| 75-79                                | 3.01 (2.70, 3.33)               | 1.14 (0.47, 1.80)    |                              |
| 80+                                  | 3.16 (2.84, 3.48)               | 0.95 (0.34, 1.56)    |                              |
| Sex                                  |                                 |                      | <.0001                       |
| Male                                 | 51.28 (50.37, 52.18)            | 43.13 (40.02, 46.62) |                              |
| Female                               | 48.72 (47.82, 49.63)            | 56.87 (53.76, 59.98) |                              |
| Ethnicity                            |                                 |                      | <.0001                       |
| White                                | 77.99 (77.23, 78.74)            | 83.64 (81.31, 85.96) |                              |
| Visible Minority                     | 22.01 (21.26, 22.77)            | 16.36 (14.04, 18.69) |                              |
| Marital Status                       |                                 |                      | <.0001                       |
| Married/Common-Law                   | 65.36 (64.49, 66.22)            | 48.29 (45.15, 51.43) |                              |
| Widowed/Separated/Divorced           | 13.75 (13.13, 14.38)            | 21.80 (19.21, 24.40) |                              |
| Single                               | 20.89 (20.15, 21.63)            | 29.91 (27.03, 32.78) |                              |
| Income (\$)                          |                                 |                      | <.0001                       |
| <20,000                              | 9.06 (8.54, 9.58)               | 15.67 (13.38, 17.95) |                              |
| 20,000-39,999                        | 17.98 (17.28, 18.68)            | 21.67 (19.08, 24.26) |                              |
| 40,000-59,999                        | 17.74 (17.05, 18.44)            | 17.75 (15.35, 20.15) |                              |
| 60,000-79,999                        | 16.24 (15.57, 16.91)            | 15.45 (13.18, 17.72) |                              |
| ≥ 80,000                             | 38.98 (38.09, 39.86)            | 29.46 (26.59, 32.32) |                              |
| Education                            |                                 |                      | <.0001                       |
| < Secondary                          | 10.23 (9.68, 10.78)             | 11.21 (9.23, 13.19)  |                              |
| Secondary                            | 16.20 (15.53, 16.87)            | 15.65 (13.37, 17.94) |                              |
| Some post-secondary                  | 10.16 (9.61, 10.71)             | 14.47 (12.26, 16.68) |                              |
| Post-secondary                       | 63.40 (62.53, 64.28)            | 58.67 (55.57, 61.76) |                              |
| Presence of Chronic Physical Illness | 33.21 (32.36, 34.07)            | 47.99 (44.85, 51.13) | <.0001                       |
| Body Mass Index (kg/m <sup>2</sup> ) | 25.45 (4.51)                    | 25.77 (5.50)         | .08                          |

CI = confidence interval, SD = standard deviation. <sup>a</sup> Statistical significance value from Chi-square test of independence or two sample t-test between depressive status and demographic characteristic.

**Table S3.** Characteristics of the 2011-2012 Canadian Community Health Survey sample.

|                                      | Frequency (95% CI) or Mean (SD)    |                               | <i>p</i> -value <sup>a</sup> |
|--------------------------------------|------------------------------------|-------------------------------|------------------------------|
|                                      | <u>Total Sample</u><br>(n = 8,217) | <u>Depressed</u><br>(n = 612) |                              |
| Age (Years)                          |                                    |                               | <.0001                       |
| 18-19                                | 2.40 (2.07, 2.73)                  | 4.17 (2.70, 5.64)             |                              |
| 20-24                                | 7.76 (7.18, 8.34)                  | 15.49 (12.82, 18.15)          |                              |
| 25-29                                | 7.65 (7.07, 8.22)                  | 9.84 (7.65, 12.03)            |                              |
| 30-34                                | 6.88 (6.33, 7.43)                  | 7.30 (5.39, 9.22)             |                              |
| 35-39                                | 7.31 (6.75, 7.87)                  | 8.61 (6.54, 10.67)            |                              |
| 40-44                                | 9.00 (8.38, 9.62)                  | 6.22 (4.44, 8.00)             |                              |
| 45-49                                | 9.75 (9.10, 10.39)                 | 11.66 (9.30, 14.02)           |                              |
| 50-54                                | 9.98 (9.33, 10.62)                 | 13.19 (10.70, 15.68)          |                              |
| 55-59                                | 11.05 (10.37, 11.72)               | 9.46 (7.31, 11.61)            |                              |
| 60-64                                | 9.28 (8.65, 9.90)                  | 6.58 (4.76, 8.41)             |                              |
| 65-69                                | 7.54 (6.97, 8.11)                  | 3.18 (1.89, 4.47)             |                              |
| 70-74                                | 5.04 (4.57, 5.52)                  | 2.32 (1.21, 3.43)             |                              |
| 75-79                                | 3.17 (2.79, 3.55)                  | 0.94 (0.23, 1.65)             |                              |
| 80+                                  | 3.21 (2.83, 3.59)                  | 1.04 (0.29, 1.79)             |                              |
| Sex                                  |                                    |                               | <.0001                       |
| Male                                 | 48.63 (47.55, 49.71)               | 40.24 (36.63, 43.85)          |                              |
| Female                               | 51.73 (50.29, 52.45)               | 59.76 (56.15, 63.37)          |                              |
| Ethnicity                            |                                    |                               | <.0001                       |
| White                                | 91.37 (90.76, 91.97)               | 86.50 (83.99, 89.02)          |                              |
| Visible Minority                     | 8.63 (8.03, 9.24)                  | 13.50 (10.98, 16.01)          |                              |
| Marital Status                       |                                    |                               | <.0001                       |
| Married/Common-Law                   | 64.99 (63.96, 66.02)               | 47.03 (43.35, 50.70)          |                              |
| Widowed/Separated/Divorced           | 13.55 (12.81, 14.29)               | 19.13 (16.24, 22.03)          |                              |
| Single                               | 21.46 (20.58, 22.35)               | 33.84 (30.36, 37.32)          |                              |
| Income (\$)                          |                                    |                               | <.0001                       |
| <20,000                              | 9.38 (8.75, 10.01)                 | 17.76 (14.95, 20.57)          |                              |
| 20,000-39,999                        | 20.05 (19.18, 20.91)               | 20.02 (17.08, 22.97)          |                              |
| 40,000-59,999                        | 19.63 (18.77, 20.49)               | 21.89 (18.84, 24.93)          |                              |
| 60,000-79,999                        | 16.43 (15.62, 17.23)               | 15.80 (13.11, 18.48)          |                              |
| ≥ 80,000                             | 34.52 (33.49, 35.55)               | 24.53 (21.36, 27.70)          |                              |
| Education                            |                                    |                               | .08                          |
| < Secondary                          | 16.78 (15.97, 17.59)               | 19.95 (17.01, 22.90)          |                              |
| Secondary                            | 18.08 (17.25, 18.91)               | 16.20 (13.49, 18.91)          |                              |
| Some post-secondary                  | 4.01 (3.59, 4.44)                  | 4.42 (2.90, 5.93)             |                              |
| Post-secondary                       | 61.13 (60.07, 62.18)               | 59.43 (55.81, 63.04)          |                              |
| Presence of Chronic Physical Illness | 43.92 (42.84, 44.99)               | 53.93 (50.26, 57.60)          | <.0001                       |
| Body Mass Index (kg/m <sup>2</sup> ) | 27.24 (5.21)                       | 28.13 (7.24)                  | .0046                        |

CI = confidence interval, SD = standard deviation. <sup>a</sup> Statistical significance value from Chi-square test of independence or two sample t-test between depressive status and demographic characteristic.

**Table S4.** Characteristics of the 2013-2014 Canadian Community Health Survey sample.

|                                      | Frequency (95% CI) or Mean (SD)     |                               | <i>p</i> -value |
|--------------------------------------|-------------------------------------|-------------------------------|-----------------|
|                                      | <u>Total Sample</u><br>(n = 11,921) | <u>Depressed</u><br>(n = 934) |                 |
| Age (Years)                          |                                     |                               | <.0001          |
| 18-19                                | 3.17 (2.86, 3.49)                   | 4.31 (3.07, 5.54)             |                 |
| 20-24                                | 8.22 (7.73, 8.72)                   | 12.97 (10.92, 15.03)          |                 |
| 25-29                                | 9.08 (8.57, 9.60)                   | 11.90 (9.93, 13.88)           |                 |
| 30-34                                | 7.19 (6.73, 7.66)                   | 8.38 (6.68, 10.07)            |                 |
| 35-39                                | 7.81 (7.33, 8.29)                   | 10.82 (8.93, 12.72)           |                 |
| 40-44                                | 8.33 (7.83, 8.82)                   | 6.66 (5.14, 8.19)             |                 |
| 45-49                                | 7.33 (6.86, 7.80)                   | 9.46 (7.67, 11.25)            |                 |
| 50-54                                | 9.52 (9.00, 10.05)                  | 7.36 (5.77, 8.96)             |                 |
| 55-59                                | 10.97 (10.41, 11.53)                | 10.96 (9.05, 12.86)           |                 |
| 60-64                                | 8.81 (8.30, 9.32)                   | 7.73 (6.10, 9.36)             |                 |
| 65-69                                | 7.14 (6.68, 7.60)                   | 5.14 (3.79, 6.48)             |                 |
| 70-74                                | 4.78 (4.40, 5.16)                   | 2.13 (1.25, 3.01)             |                 |
| 75-79                                | 3.41 (3.08, 3.73)                   | 1.45 (0.72, 2.18)             |                 |
| 80+                                  | 4.23 (3.18, 5.28)                   | 0.73 (0.00, 2.23)             |                 |
| Sex                                  |                                     |                               | <.0001          |
| Male                                 | 49.55 (48.65, 50.45)                | 35.99 (33.06, 38.92)          |                 |
| Female                               | 50.45 (49.55, 51.35)                | 64.01 (61.08, 66.94)          |                 |
| Ethnicity                            |                                     |                               | .49             |
| White                                | 83.69 (83.02, 84.35)                | 84.45 (82.24, 86.67)          |                 |
| Visible Minority                     | 16.31 (15.65, 16.98)                | 15.55 (13.33, 17.76)          |                 |
| Marital Status                       |                                     |                               | <.0001          |
| Married/Common-Law                   | 62.54 (61.67, 63.41)                | 45.27 (42.24, 48.31)          |                 |
| Widowed/Separated/Divorced           | 13.01 (12.41, 13.62)                | 17.42 (15.10, 19.73)          |                 |
| Single                               | 24.45 (23.68, 25.22)                | 37.31 (34.36, 40.26)          |                 |
| Income (\$)                          |                                     |                               | <.0001          |
| <20,000                              | 7.67 (7.19, 8.14)                   | 14.08 (11.96, 16.21)          |                 |
| 20,000-39,999                        | 17.83 (17.15, 18.52)                | 23.12 (20.55, 25.69)          |                 |
| 40,000-59,999                        | 17.69 (17.00, 18.37)                | 15.69 (13.47, 17.91)          |                 |
| 60,000-79,999                        | 16.82 (16.15, 17.42)                | 16.90 (14.61, 19.18)          |                 |
| ≥ 80,000                             | 40.00 (39.15, 40.88)                | 30.21 (27.40, 33.01)          |                 |
| Education                            |                                     |                               | <.0001          |
| < Secondary                          | 14.26 (13.63, 14.89)                | 11.55 (9.60, 13.50)           |                 |
| Secondary                            | 21.83 (21.09, 22.57)                | 23.83 (21.23, 26.43)          |                 |
| Some post-secondary                  | 6.14 (5.71, 6.57)                   | 7.02 (5.46, 8.58)             |                 |
| Post-secondary                       | 57.78 (56.89, 58.66)                | 57.60 (54.58, 60.62)          |                 |
| Presence of Chronic Physical Illness | 42.64 (41.75, 43.52)                | 52.74 (49.69, 55.79)          | <.0001          |
| Body Mass Index (kg/m <sup>2</sup> ) | 27.24 (5.62)                        | 27.93 (7.00)                  | .0024           |

CI = confidence interval, SD = standard deviation. <sup>a</sup> Statistical significance value from Chi-square test of independence or two sample t-test between depressive status and demographic characteristic.

**Table S5.** Characteristics of respondents included and excluded from analysis (2007-2008 sample).

|                                      | Frequency (95% CI) or Mean (SD) |                                | <i>p</i> -value <sup>a</sup> |
|--------------------------------------|---------------------------------|--------------------------------|------------------------------|
|                                      | <u>Included</u><br>(n = 34,010) | <u>Excluded</u><br>(n = 2,706) |                              |
| Age (Years)                          |                                 |                                | <.0001                       |
| 18-19                                | 2.46 (2.29, 2.62)               | 2.22 (1.33, 3.11)              |                              |
| 20-24                                | 8.23 (7.94, 8.52)               | 6.38 (4.91, 7.84)              |                              |
| 25-29                                | 9.26 (8.96, 9.57)               | 5.36 (4.01, 6.72)              |                              |
| 30-34                                | 9.31 (9.00, 9.62)               | 7.90 (6.28, 9.52)              |                              |
| 35-39                                | 9.11 (8.80, 9.41)               | 9.43 (7.68, 11.19)             |                              |
| 40-44                                | 10.16 (9.84, 10.49)             | 9.09 (7.36, 10.82)             |                              |
| 45-49                                | 10.94 (10.61, 11.28)            | 11.66 (9.73,13.59)             |                              |
| 50-54                                | 10.51 (10.18, 10.83)            | 8.17 (6.53, 9.82)              |                              |
| 55-59                                | 8.75 (8.45, 9.06)               | 6.90 (5.37, 8.42)              |                              |
| 60-64                                | 6.79 (6.52, 7.06)               | 8.93 (7.21, 10.64)             |                              |
| 65-69                                | 5.10 (4.87, 5.34)               | 5.16 (3.83, 6.49)              |                              |
| 70-74                                | 3.98 (3.77, 4.19)               | 5.62 (4.23, 7.00)              |                              |
| 75-79                                | 2.90 (2.72, 3.08)               | 6.62 (5.12, 8.12)              |                              |
| 80+                                  | 2.49 (2.32, 2.65)               | 6.56 (5.07, 8.05)              |                              |
| Sex                                  |                                 |                                | .09                          |
| Male                                 | 51.25 (50.72, 51.78)            | 52.59 (49.59, 55.59)           |                              |
| Female                               | 48.75 (48.22, 49.28)            | 47.41 (44.41, 50.41)           |                              |
| Ethnicity                            |                                 |                                | <.0001                       |
| White                                | 89.08 (88.75, 89.41)            | 79.55 (75.16, 83.94)           |                              |
| Visible Minority                     | 10.92 (10.59, 11.25)            | 20.45 (16.06, 24.84)           |                              |
| Marital Status                       |                                 |                                | <.0001                       |
| Married/Common-Law                   | 64.73 (64.23, 65.24)            | 58.25 (55.28, 61.22)           |                              |
| Widowed/Separated/Divorced           | 13.11 (12.75, 13.47)            | 18.87 (16.51, 21.23)           |                              |
| Single                               | 22.15 (21.71, 22.60)            | 22.88 (20.35, 25.41)           |                              |
| Income (\$)                          |                                 |                                | <.0001                       |
| <20,000                              | 9.50 (9.19, 9.81)               | 20.27 (14.48, 26.07)           |                              |
| 20,000-39,999                        | 20.06 (19.63, 20.49)            | 24.26 (18.08, 30.44)           |                              |
| 40,000-59,999                        | 19.06 (18.64, 19.48)            | 18.36 (12.78, 23.94)           |                              |
| 60,000-79,999                        | 16.13 (15.74, 16.52)            | 11.07 (6.55, 15.59)            |                              |
| ≥ 80,000                             | 35.25 (34.74, 35.75)            | 26.04 (19.71, 32.36)           |                              |
| Education                            |                                 |                                | <.0001                       |
| < Secondary                          | 16.47 (16.07, 16.86)            | 27.28 (22.27, 32.30)           |                              |
| Secondary                            | 13.84 (13.47, 14.21)            | 14.24 (10.31, 18.17)           |                              |
| Some post-secondary                  | 7.91 (7.63, 8.20)               | 5.00 (2.55, 7.45)              |                              |
| Post-secondary                       | 61.78 (61.26, 62.30)            | 53.48 (47.86, 59.09)           |                              |
| Presence of Chronic Physical Illness | 33.60 (33.10, 34.11)            | 40.06 (37.11, 43.00)           | <.0001                       |
| Body Mass Index (kg/m <sup>2</sup> ) | 25.96 (4.94)                    | 25.77 (5.11)                   | .38                          |

CI = confidence interval, SD = standard deviation. <sup>a</sup> Statistical significance value from Chi-square test of independence or two sample t-test between depressive status and demographic characteristic.

**Table S6.** Unadjusted and adjusted odds ratios (ORs) for associations between depression and measures of health behaviour change (2007-2014)

| Year      | Recent Health Behaviour Change |                         | Desire to Make Health Behaviour Changes |                         | Barriers to Health Behaviour Change |                         |
|-----------|--------------------------------|-------------------------|-----------------------------------------|-------------------------|-------------------------------------|-------------------------|
|           | Crude OR<br>(95% CI)           | Adjusted OR<br>(95% CI) | Crude OR<br>(95% CI)                    | Adjusted OR<br>(95% CI) | Crude OR<br>(95% CI)                | Adjusted OR<br>(95% CI) |
| 2007-2008 | 1.62 (1.47, 1.78)              | 1.39 (1.26, 1.53)       | 1.53 (1.38, 1.70)                       | 1.38 (1.24, 1.55)       | 1.54 (1.39, 1.71)                   | 1.45 (1.31, 1.62)       |
| 2009-2010 | 1.44 (1.25, 1.65)              | 1.20 (1.03, 1.38)       | 2.48 (2.08, 2.96)                       | 2.20 (1.83, 2.64)       | 1.62 (1.39, 1.87)                   | 1.55 (1.33, 1.80)       |
| 2011-2012 | 1.38 (1.17, 1.63)              | 1.22 (1.03, 1.45)       | 2.58 (2.04, 3.26)                       | 2.25 (1.77, 2.88)       | 1.99 (1.68, 2.37)                   | 1.88 (1.57, 2.24)       |
| 2013-2014 | 2.20 (1.91, 2.54)              | 1.79 (1.54, 2.08)       | 1.68 (1.42, 1.98)                       | 1.49 (1.25, 1.76)       | 1.67 (1.45, 1.93)                   | 1.49 (1.29, 1.74)       |
| Pooled    | 1.63 (1.35, 1.97)              | 1.39 (1.30, 1.48)       | 1.80 (1.67, 1.94)                       | 1.61 (1.49, 1.74)       | 1.65 (1.54, 1.76)                   | 1.54 (1.44, 1.65)       |

CI = confidence interval. All analyses are weighted. Adjusted covariates include age, gender, ethnicity, marital status, annual household income, educational attainment, continuous body mass index, and presence of a chronic physical illness.



**Table S7.** Prevalence estimates of most important changes made in previous year by depressive status (2007-2008)

|                            | Depressed<br>(95% CI) <sup>a</sup> | Non-depressed<br>(95% CI) <sup>b</sup> | <i>p</i> -value <sup>a</sup> |
|----------------------------|------------------------------------|----------------------------------------|------------------------------|
| Exercised                  | 42.14 (39.59, 44.69)               | 51.21 (50.48, 51.94)                   | <.0001                       |
| Lost weight                | 9.50 (7.99, 11.01)                 | 10.67 (10.22, 11.12)                   | .17                          |
| Changed eating habits      | 13.22 (11.48, 14.96)               | 17.23 (16.68, 17.78)                   | <.0001                       |
| Reduced/quit smoking       | 8.70 (7.25, 10.15)                 | 6.83 (6.46, 7.20)                      | .01                          |
| Reduced alcohol            | 1.14 (0.59, 1.69)                  | 0.91 (0.77, 1.05)                      | .39                          |
| Reduced stress             | 3.94 (2.94, 4.94)                  | 1.63 (1.45, 1.81)                      | <.0001                       |
| Received medical treatment | 10.56 (8.97, 12.15)                | 5.32 (4.99, 5.65)                      | <.0001                       |
| Took vitamins              | 1.22 (0.65, 1.79)                  | 1.14 (0.98, 1.30)                      | .65                          |
| Other                      | 9.59 (8.06, 11.12)                 | 5.06 (4.75, 5.37)                      | <.0001                       |

All estimates are weighted to the Canadian population. <sup>a</sup> n = 2,207. <sup>b</sup> n = 31,803. <sup>c</sup> Statistical significance value from Chi-square test of independence between depressive status and type of health behaviour change.

**Table S8.** Prevalence estimates of most important changes needed to improve physical health by depressive status (2007-2008)

|                           | Depressed<br>(95% CI) <sup>a</sup> | Non-depressed<br>(95% CI) <sup>b</sup> | <i>p</i> -value <sup>a</sup> |
|---------------------------|------------------------------------|----------------------------------------|------------------------------|
| Increase exercise         | 41.67 (39.26, 44.08)               | 52.22 (51.55, 52.89)                   | <.0001                       |
| Lose weight               | 8.40 (7.05, 9.75)                  | 8.89 (8.52, 9.26)                      | .50                          |
| Change eating habits      | 13.11 (11.46, 14.76)               | 16.83 (16.34, 17.32)                   | .0001                        |
| Reduce/quit smoking       | 22.39 (20.35, 24.43)               | 14.01 (13.56, 14.46)                   | <.0001                       |
| Reduce alcohol            | 0.75 (0.32, 1.18)                  | 0.72 (0.60, 0.84)                      | <.0001                       |
| Reduce stress             | 4.35 (3.35, 5.35)                  | 2.66 (2.44, 2.88)                      | <.0001                       |
| Receive medical treatment | 2.43 (1.69, 3.17)                  | 1.12 (0.98, 1.26)                      | <.0001                       |
| Take vitamins             | 0.08 (0.00, 0.22)                  | 0.16 (0.10, 0.22)                      | .50                          |
| Other                     | 6.82 (5.59, 8.05)                  | 3.38 (3.14, 3.62)                      | <.0001                       |

All estimates are weighted to the Canadian population. <sup>a</sup> n = 2,193. <sup>b</sup> n = 31,625. <sup>c</sup> Statistical significance value from Chi-square test of independence between depressive status and type of health behaviour change.

**Table S9.** Prevalence estimates of types of barriers to change by depressive status (2007-2008)

|                         | Depressed<br>(95% CI) <sup>a</sup> | Non-depressed<br>(95% CI) <sup>b</sup> | <i>p</i> -value <sup>c</sup> |
|-------------------------|------------------------------------|----------------------------------------|------------------------------|
| Lack willpower          | 33.20 (30.30, 36.10)               | 34.83 (33.95, 35.71)                   | .30                          |
| Family responsibilities | 9.02 (7.26, 10.78)                 | 13.58 (12.95, 14.21)                   | <.0001                       |
| Work schedule           | 16.48 (14.19, 18.77)               | 23.54 (22.76, 24.32)                   | <.0001                       |
| Addiction               | 2.44 (1.48, 3.40)                  | 0.89 (0.71, 1.07)                      | <.0001                       |
| Physical condition      | 5.92 (4.47, 7.37)                  | 2.23 (1.96, 2.50)                      | <.0001                       |
| Disabled                | 7.61 (5.96, 9.26)                  | 4.53 (4.16, 4.90)                      | <.0001                       |
| Stressed                | 10.32 (8.44, 12.20)                | 4.19 (3.82, 4.56)                      | <.0001                       |
| Financial constraints   | 6.34 (4.83, 7.85)                  | 4.01 (3.66, 4.36)                      | .0004                        |
| Not available in area   | 0.86 (0.29, 1.43)                  | 0.79 (0.63, 0.95)                      | .83                          |
| Transportation problems | 0.58 (0.11, 1.05)                  | 0.42 (0.30, 0.54)                      | .46                          |
| Weather problems        | 2.05 (1.17, 2.93)                  | 1.51 (1.29, 1.73)                      | .18                          |
| Other                   | 20.92 (18.41, 23.43)               | 21.97 (21.21, 22.73)                   | .44                          |

All estimates are weighted to the Canadian population. <sup>a</sup> n = 1,667 <sup>b</sup> n = 20,742. <sup>c</sup> Statistical significance value from Chi-square test of independence between depressive status and type of barrier reported.

**STROBE Statement**—Checklist of items that should be included in reports of *cross-sectional studies*

**Title:** Associations between Depression and Health Behaviour Change: Findings from Eight Cycles of the Canadian Community Health Survey

**Authors:** ZM Clayborne, I Colman; School of Epidemiology and Public Health, University of Ottawa

**Journal:** The Canadian Journal of Psychiatry

|                           | <b>Item No</b> | <b>Recommendation</b>                                                                                                                                                                | <b>Completed (Yes/No), page #</b>             |
|---------------------------|----------------|--------------------------------------------------------------------------------------------------------------------------------------------------------------------------------------|-----------------------------------------------|
| <b>Title and abstract</b> | 1              | (a) Indicate the study's design with a commonly used term in the title or the abstract                                                                                               | Yes, Abstract p. 2                            |
|                           |                | (b) Provide in the abstract an informative and balanced summary of what was done and what was found                                                                                  | Yes, Abstract p. 2                            |
| <b>Introduction</b>       |                |                                                                                                                                                                                      |                                               |
| Background/rationale      | 2              | Explain the scientific background and rationale for the investigation being reported                                                                                                 | Yes, p. 4-5                                   |
| Objectives                | 3              | State specific objectives, including any prespecified hypotheses                                                                                                                     | Yes, p. 5-6                                   |
| <b>Methods</b>            |                |                                                                                                                                                                                      |                                               |
| Study design              | 4              | Present key elements of study design early in the paper                                                                                                                              | Yes, p. 6-7                                   |
| Setting                   | 5              | Describe the setting, locations, and relevant dates, including periods of recruitment, exposure, follow-up, and data collection                                                      | Yes, p. 6-7 (Methods – Participants)          |
| Participants              | 6              | (a) Give the eligibility criteria, and the sources and methods of selection of participants                                                                                          | Yes, p. 6-7 (Methods – Participants)          |
| Variables                 | 7              | Clearly define all outcomes, exposures, predictors, potential confounders, and effect modifiers. Give diagnostic criteria, if applicable                                             | Yes, p. 7-9 (Methods – Measures)              |
| Data sources/measurement  | 8*             | For each variable of interest, give sources of data and details of methods of assessment (measurement). Describe comparability of assessment methods if there is more than one group | Yes, p. 7-9 (Methods – Measures)              |
| Bias                      | 9              | Describe any efforts to address potential sources of bias                                                                                                                            | Yes, p. 11 (sensitivity analysis)             |
| Study size                | 10             | Explain how the study size was arrived at                                                                                                                                            | Yes, p. 6-7 (Methods – Participants)          |
| Quantitative variables    | 11             | Explain how quantitative variables were handled in the analyses. If applicable, describe which groupings were chosen and why                                                         | Yes, p. 9-11 (Methods – Statistical Analyses) |
| Statistical methods       | 12             | (a) Describe all statistical methods, including those used to control for confounding                                                                                                | Yes, p. 9-10                                  |
|                           |                | (b) Describe any methods used to examine subgroups and interactions                                                                                                                  | Yes, p. 10                                    |
|                           |                | (c) Explain how missing data were addressed                                                                                                                                          | Yes, p. 9-10 (complete case analysis)         |

|                          |     |                                                                                                                                                                                                              |                                                    |
|--------------------------|-----|--------------------------------------------------------------------------------------------------------------------------------------------------------------------------------------------------------------|----------------------------------------------------|
|                          |     | (d) If applicable, describe analytical methods taking account of sampling strategy                                                                                                                           | Yes, p. 10 (sampling weights)                      |
|                          |     | (e) Describe any sensitivity analyses                                                                                                                                                                        | Yes, p. 10                                         |
| <b>Results</b>           |     |                                                                                                                                                                                                              |                                                    |
| Participants             | 13* | (a) Report numbers of individuals at each stage of study—eg numbers potentially eligible, examined for eligibility, confirmed eligible, included in the study, completing follow-up, and analysed            | Yes, p. 11, table S4                               |
|                          |     | (b) Give reasons for non-participation at each stage                                                                                                                                                         | N/A                                                |
|                          |     | (c) Consider use of a flow diagram                                                                                                                                                                           | N/A                                                |
| Descriptive data         | 14* | (a) Give characteristics of study participants (eg demographic, clinical, social) and information on exposures and potential confounders                                                                     | Yes, p. 11; Tables 1, S1-S3 (exposed, full sample) |
|                          |     | (b) Indicate number of participants with missing data for each variable of interest                                                                                                                          | Table S4 (description of ineligible)               |
| Outcome data             | 15* | Report numbers of outcome events or summary measures                                                                                                                                                         | Yes, p. 12                                         |
| Main results             | 16  | (a) Give unadjusted estimates and, if applicable, confounder-adjusted estimates and their precision (eg, 95% confidence interval). Make clear which confounders were adjusted for and why they were included | Yes, p. 12-14, Tables 2-4, Tables S5-S8            |
|                          |     | (b) Report category boundaries when continuous variables were categorized                                                                                                                                    | Yes (for exposure, methods), p. 7                  |
|                          |     | (c) If relevant, consider translating estimates of relative risk into absolute risk for a meaningful time period                                                                                             | N/A                                                |
| Other analyses           | 17  | Report other analyses done—eg analyses of subgroups and interactions, and sensitivity analyses                                                                                                               | Yes, p. 12                                         |
| <b>Discussion</b>        |     |                                                                                                                                                                                                              |                                                    |
| Key results              | 18  | Summarise key results with reference to study objectives                                                                                                                                                     | Yes, p. 14-15                                      |
| Limitations              | 19  | Discuss limitations of the study, taking into account sources of potential bias or imprecision. Discuss both direction and magnitude of any potential bias                                                   | Yes, p. 18-19                                      |
| Interpretation           | 20  | Give a cautious overall interpretation of results considering objectives, limitations, multiplicity of analyses, results from similar studies, and other relevant evidence                                   | Yes, p. 15-18                                      |
| Generalisability         | 21  | Discuss the generalisability (external validity) of the study results                                                                                                                                        | Yes, p. 17-19                                      |
| <b>Other information</b> |     |                                                                                                                                                                                                              |                                                    |
| Funding                  | 22  | Give the source of funding and the role of the funders for the present study and, if applicable, for the original study on which the present article is based                                                | Yes, p. 21-22 (under “Funding”)                    |
